# Supplementary material
Source: publisher figshare collection journal article supplement (https://brill.figshare.com/ndownloader/files/22625903)
Supplement: Supplementary file 1 [file 22625903]

**Slope aspect influences soil microbial community structure and composition in the Israel arid Mediterranean**

I. Moroenyane<sup>a,\*</sup>, B.M. Tripathi<sup>b,\*</sup>, J.M. Adams<sup>c,\*\*</sup>, S. Chen<sup>d</sup> and Y. Steinberger<sup>d,\*\*</sup>

<sup>a</sup>*Institut National de la Recherche Scientifique, Institut Armand-Frappier Santé Biotechnologie, 531*

*Boulevard, Laval, Québec, H7V1B7, Canada*

<sup>b</sup>*Korea Polar Research Institute, Incheon, 406-840, Korea*

<sup>c</sup>*School of Oceanography and Geography, Nanjing University, Nanjing 210008, China*

<sup>d</sup>*The Mina and Everard Goodman Faculty of Life Sciences, Bar-Ilan University, Ramat-Gan, 52900,*

*Israel*

\*Authors contributed equally to the work.

\*\*Corresponding authors. E-mails: foundinkualalumpur@yahoo.com / Yosef.Steinberger@biu.ac.il

**Supplementary material**

Table S1 The estimated richness OTUs in the dataset as measured by (Chao, Jack1, Jack2, and Bootstrap) with variance ( $\pm$ ) indicating number of unseen OTUs.

| Taxon    | OTUs  | Chao                    | Jack1                   | Jack2    | Bootstrap               |
|----------|-------|-------------------------|-------------------------|----------|-------------------------|
| Bacteria | 8558  | 16376.84 $\pm$ 325.8619 | 12945.6 $\pm$ 1182.724  | 15958.32 | 10406.95 $\pm$ 485.2659 |
| Fungi    | 16381 | 55931.12 $\pm$ 1204.895 | 27724.73 $\pm$ 3056.108 | 36855.5  | 20933.9 $\pm$ 1131.046  |

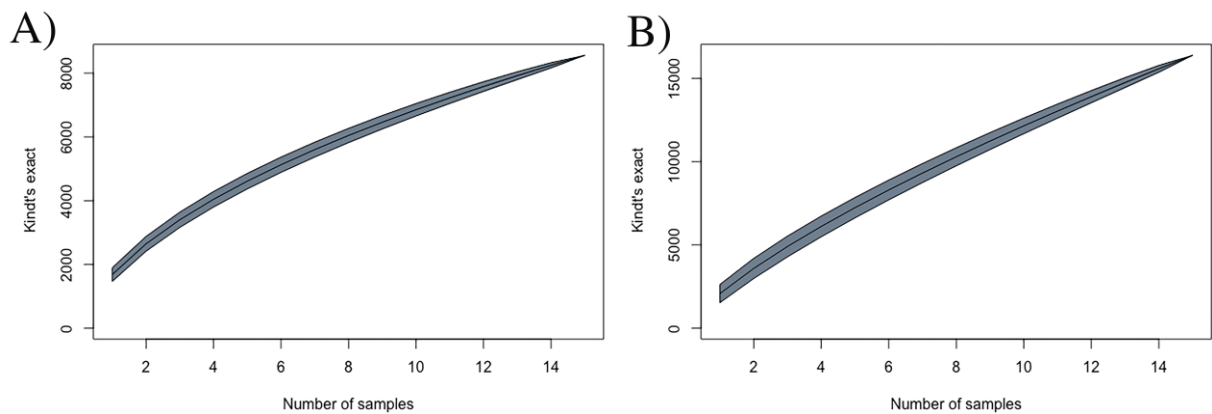

Figure S1 Species accumulation curve with A) bacteria and B) fungi both curves indicating high abundance of recovered OTUs. In total, 6 031 124 bacterial (8558 OTUs) and 7 132 381(16381 OTUs) fungal reads were obtained.

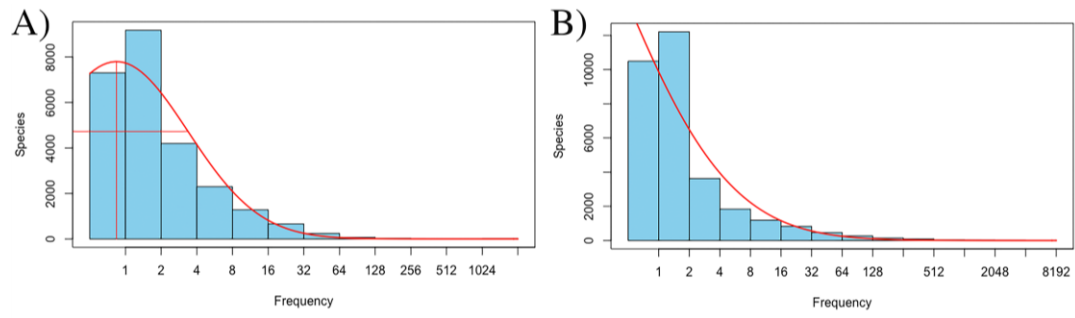

Figure S2 Preston log normal curve indicating the proportion of rare OTUs and the expected OTUs (area under the curve) with A) indicating few rare OTUs (truncation point far below the mode) and B) indicating increased number of unique OTUs.

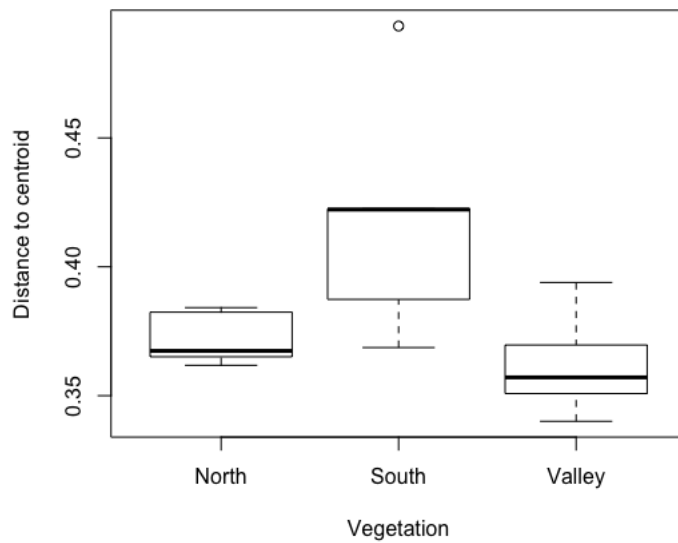

Figure S3 Homogeneity and multivariate dispersion within bacterial community.

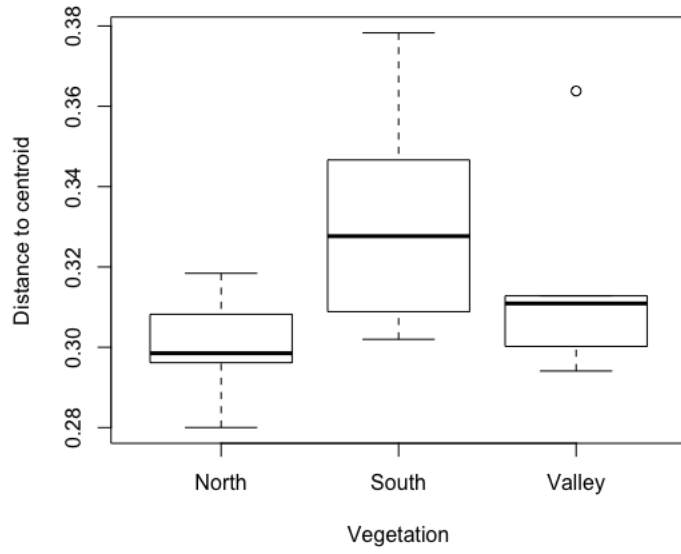

Figure S4 Homogeneity and multivariate dispersion within fungal community.

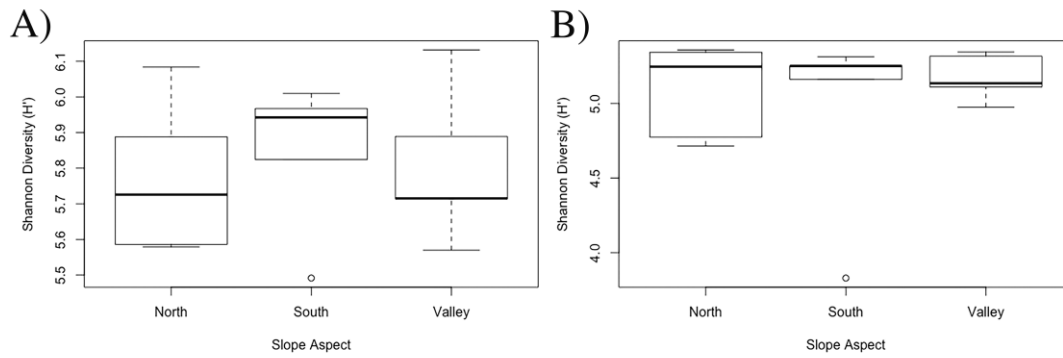

Figure S5 Shannon diversity with A) bacteria and B) fungi across the different slope aspects.

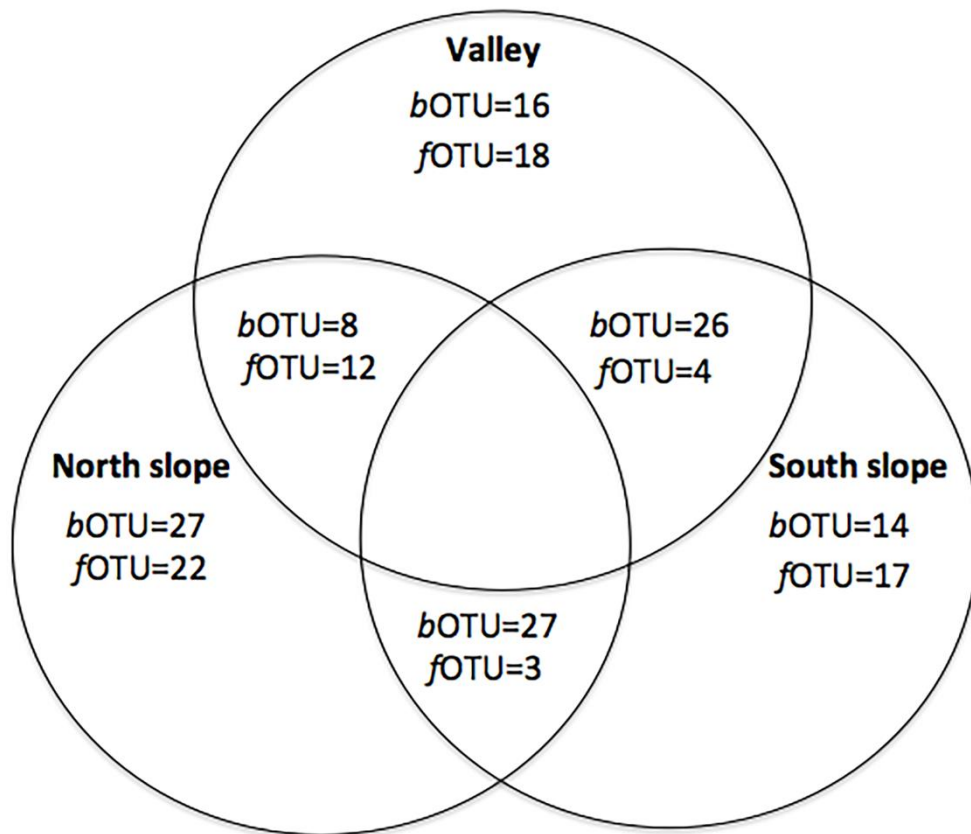

Figure S6 Indicator OTUs and their association with the specific sites with *bOTU* indicating bacterial OTUs and *fOTU* indicating fungal OTUs. There were more shared *bOTU* than *fOTU*.
